# Supplementary material for: Cocoa flavanols improve peakVO2 and exercise capacity in a randomized double blinded clinical trial in healthy elderly people
Source: Royal Society of Chemistry journal article supplement (doi:10.1039/d3fo01737k), 2023-01-01
Supplement: d3fo01737k1.pdf [file d3fo01737k1.pdf]

## Supplementary information

**Table S1:**

| Parameter                                        | Placebo        | Cocoa flavanol |
|--------------------------------------------------|----------------|----------------|
| Daily serving size                               | 4 capsules/day | 4 capsules/day |
| Total cocoa flavanols (DP 1-7) <sup>2</sup> (mg) | nd             | 1000           |
| Total flavanol monomers <sup>3</sup> (mg)        | nd             | 220            |
| (-)-epicatechin <sup>3</sup> (mg)                | nd             | 160            |
| (+)-catechin <sup>3</sup> (mg)                   | nd             | 6.0            |
| (-)-catechin <sup>3</sup> (mg)                   | nd             | 50             |
| Calories (kcal)                                  | <5             | <5             |
| Total fat (g)                                    | <0.2           | <0.2           |
| Saturated fat (g)                                | <0.15          | <0.15          |
| Total carbohydrates (g)                          | <0.5           | <0.5           |
| Sugars (g)                                       | 0              | 0              |
| Fiber (g)                                        | <0.5           | <0.5           |
| Protein (g)                                      | <0.1           | <0.1           |
| Theobromine (mg)                                 | 100            | 100            |
| Caffeine (mg)                                    | 30             | 30             |

**Table S1:** Composition of daily cocoa flavanol and placebo interventions. The participants consumed 2 of capsules in the morning with breakfast and 2 at night with dinner. nd = not detected.

<sup>1</sup> Test material is not a significant source ( $\leq 1$  mg/serving) of sodium, potassium, iron, magnesium, copper, manganese, phosphorous, or calcium.

<sup>2</sup> Analysis based on AOAC 2020.05. Cocoa flavanols includes flavanol monomers and procyanidins with a degree of polymerization (DP) up to 7 units.

<sup>3</sup> Analysis based on AOAC official method. AOAC 2020.05-2020 Flavanol and Procyanidin (by Degree of Polymerization).

Available from:

[http://www.aoacofficialmethod.org/index.php?main\\_page=product\\_info&products\\_id=3046](http://www.aoacofficialmethod.org/index.php?main_page=product_info&products_id=3046)
